# Supplementary material for: Novel [Ce1−xLaxO2, La2−yCeyO3]/Bi2Mo0.9W0.1O6 catalysts for CO oxidation at low temperature
Source: Royal Society of Chemistry journal article supplement (doi:10.1039/c2cy00368f), 2012-01-01

**Electronic Supporting Information**

**Novel [Ce<sub>1-x</sub>La<sub>x</sub>O<sub>2</sub>, La<sub>2-y</sub>Ce<sub>y</sub>O<sub>3</sub>]/Bi<sub>2</sub>Mo<sub>0.9</sub>W<sub>0.1</sub>O<sub>6</sub> Catalysts for CO  
Oxidation at Low Temperature**

R. Rangel, R. Maya-Yescas

*Universidad Michoacana de S.N.H., Morelia, Mich., México.*

P. Bartolo-Pérez

*Cinvestav-IPN, Mérida, Yuc., México.*

R. García

*Departamento de Investigación en Física, Universidad de Sonora, Hermosillo, Son.*

*México.*

**Figure S1.** SEM images of  $\text{CeO}_2$ ,  $\text{Bi}_2\text{Mo}_{0.9}\text{W}_{0.1}\text{O}_6$ , and  $\text{La}_{1.9}\text{Ce}_{0.1}\text{O}_3$ ,  $\text{La}_{1.5}\text{Ce}_{0.5}\text{O}_3$ ,  $\text{Ce}_{0.9}\text{La}_{0.1}\text{O}_2$ ,  $\text{Ce}_{0.9}\text{La}_{0.1}\text{O}_2$  compounds supported on  $\text{Bi}_2\text{Mo}_{0.9}\text{W}_{0.1}\text{O}_6$ .

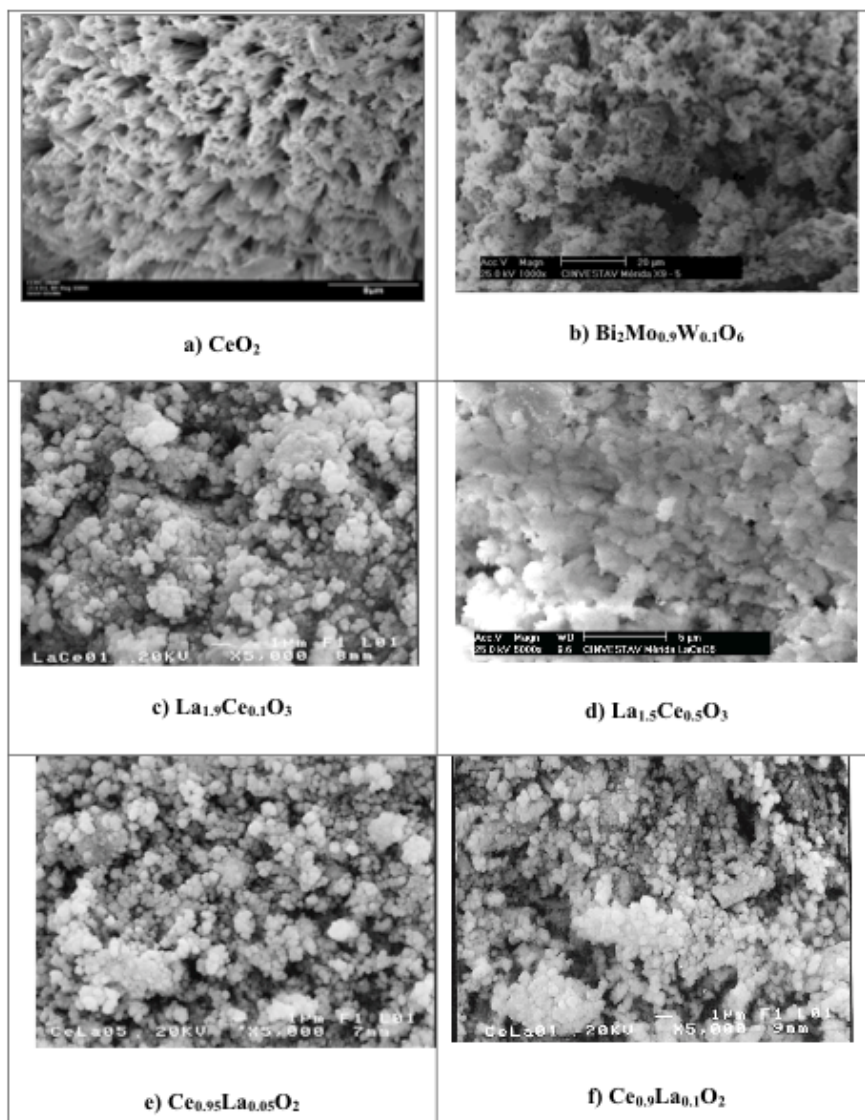

Through SEM microscopy the catalysts were analysed to observe their morphology. The  $\text{CeO}_2$  compound, Figure 3 S1 a), shows a fiber-like morphology, with an average length of 0.25  $\mu\text{m}$ . Their shape and size are homogeneous. Regarding the  $\text{Bi}_2\text{Mo}_{0.9}\text{W}_{0.1}\text{O}_6$ , it shows spongy-like grains with an average size of 5.00  $\mu\text{m}$  (see Figure S1 b). In the case of the La-Ce system for a dopant concentration of  $x=0.1$  the formation of a homogeneous phase it is observed, consisting in rounded crystals close to 0.50  $\mu\text{m}$  size. For a concentration of  $x=0.5$  cerium, the size of the grains is increased up to 1  $\mu\text{m}$ .  $\text{La}_{1.9}\text{Ce}_{0.1}\text{O}_3$  compound showed rounded grain morphology with an average size below 1  $\mu\text{m}$  (see Figure S1 c). Increasing the dopant content up to  $x=0.5$  ( $\text{La}_{1.5}\text{Ce}_{0.5}\text{O}_3$ ), the grains observed are larger and flat.

**Figure S2.** Catalytic activity of  $\text{Ce}_{0.95}\text{La}_{0.05}\text{O}_2$  and  $\text{La}_{1.9}\text{Ce}_{0.1}\text{O}_3$  unsupported solid-solutions.

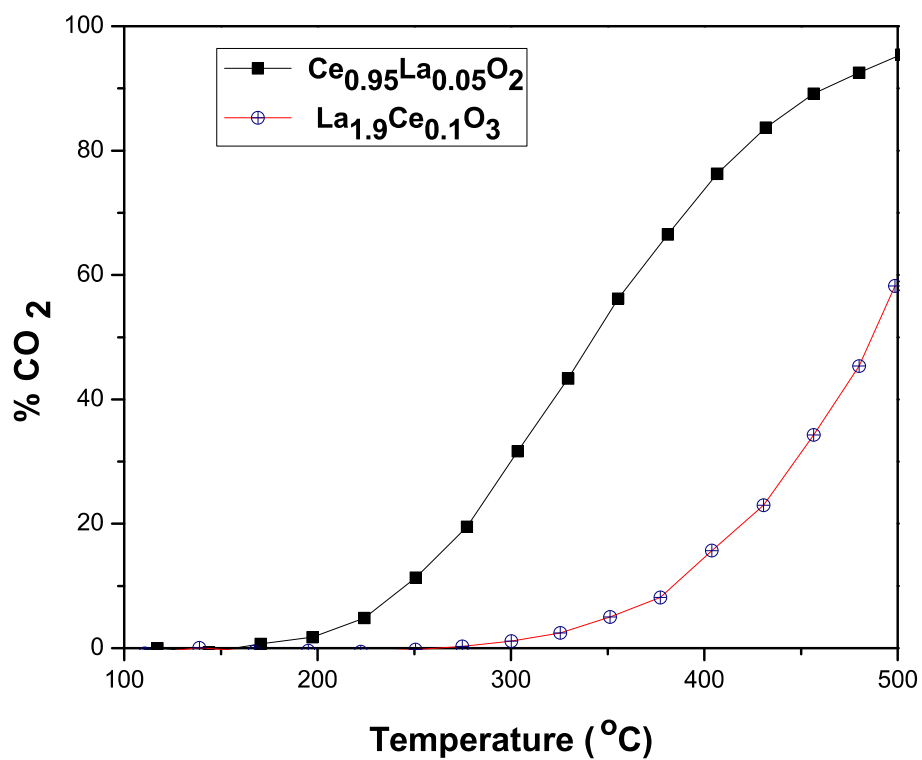

Supplement: c2cy00368f.pdf [file c2cy00368f.pdf]
